# Supplementary material for: PPARα inhibits vascular smooth muscle cell proliferation underlying intimal hyperplasia by inducing the tumor suppressor p16INK4a
Source: JCI journal article supplement (doi:10.1172/jci22756), 2005-10-26
Supplement: sd1 [file 1]

## Supplemental data

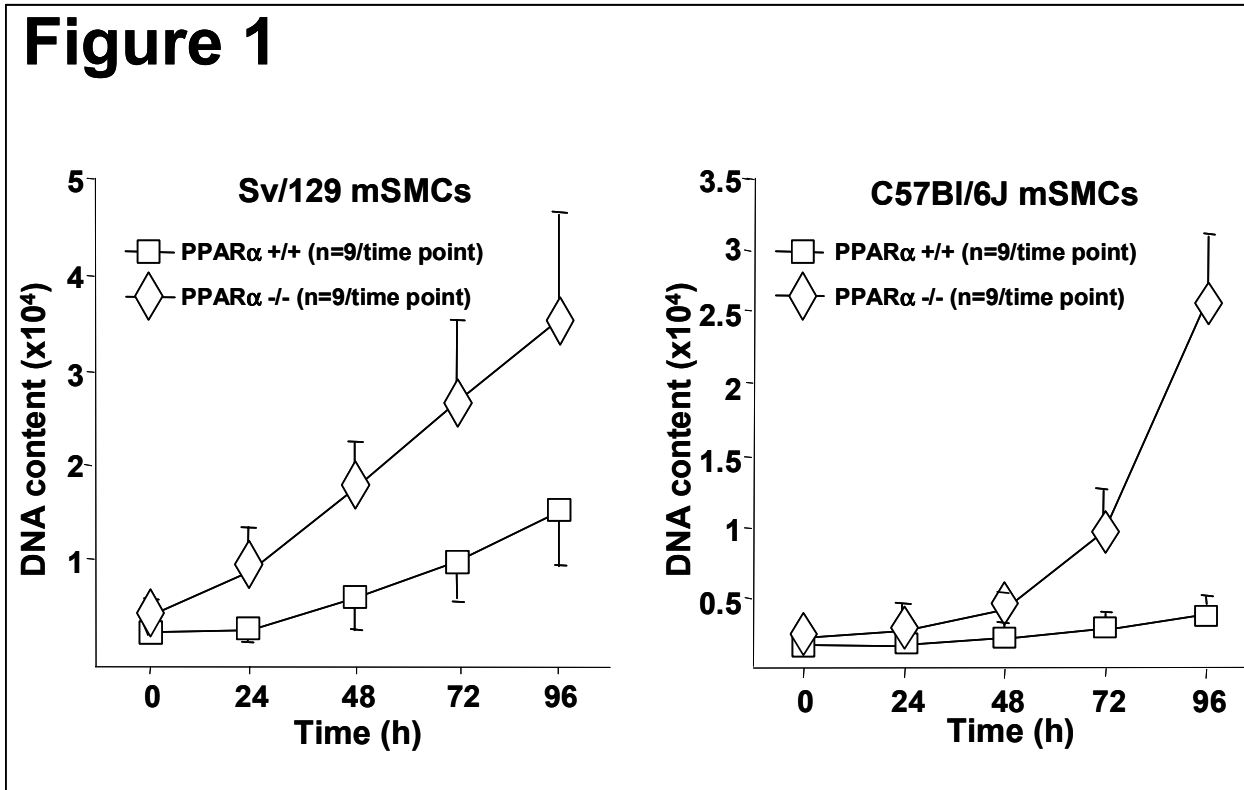

**Figure 1. PPAR $\alpha$  controls SMC proliferation.** G<sub>1</sub>-arrested PPAR $\alpha$ -null (-/-) or wild-type (+/+) Sv/129 or C57Bl/6J mSMCs resumed growth at T0 in normal growth medium (GM). Values are the mean  $\pm$  SEM of triplicate points from a single experiment performed with preparations from three different animals (n = 9/time point) .

# Figure 2

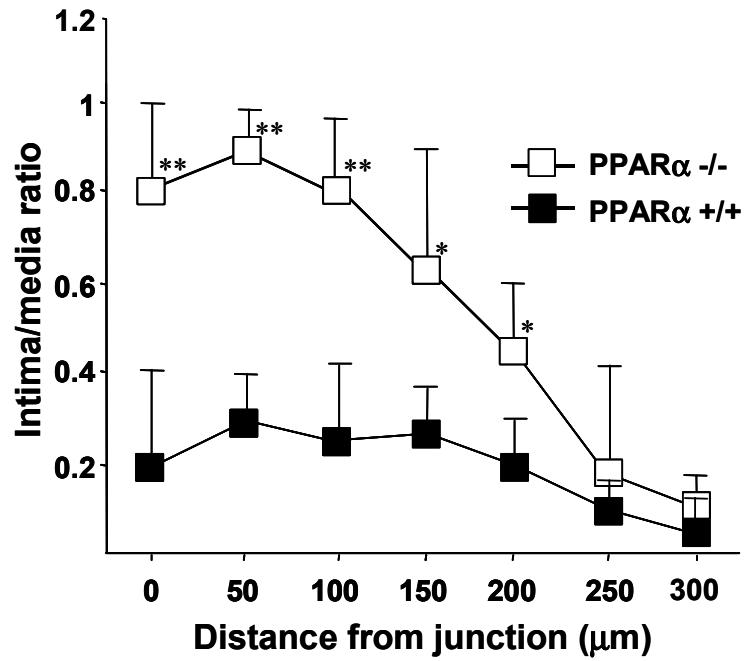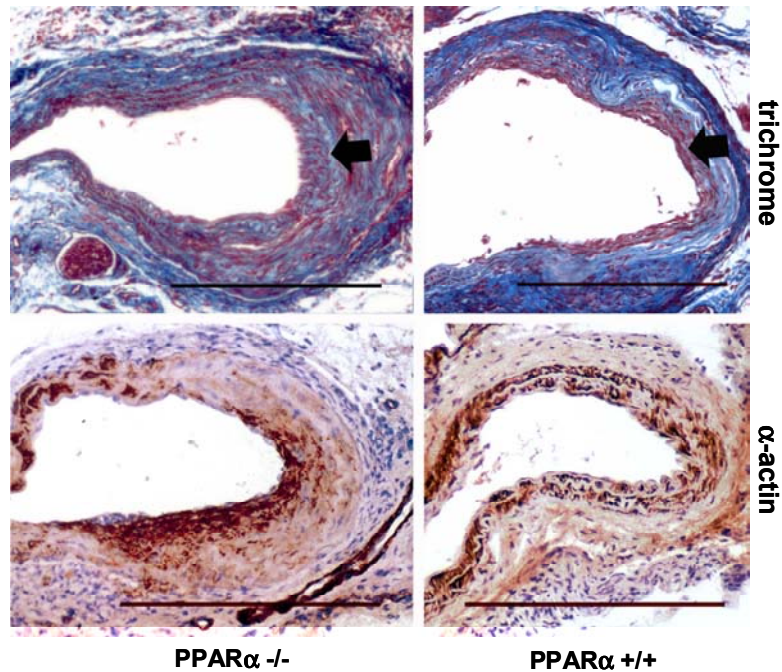

Figure 2. PPAR $\alpha$ -deficiency abolishes hyperplasia-resistance in C57Bl/6J mice. Left carotid arteries from PPAR $\alpha$ -null (n=7) or wild-type (n=5) C57Bl/6J mice were submitted to

a carotid mechanical injury and analyzed as described in "*Experimental Procedures*". **A. Topographic pattern of intima/media area ratio after injury.** Values are mean  $\pm$  SEM of the intima/media ratios measured at the indicated distances from the junction on Masson's trichrome stained sections. \* $p \leq 0.05$ , \*\* $p \leq 0.01$  vs wild-type sections **B. Representative sections of mouse carotid stained for morphometry or SMC identification.** Carotid section were stained with Masson's trichrome or an  $\alpha$ -actin antibody, at respectively 100 and 50  $\mu$ M from the junction. Bar = 300  $\mu$ M. The internal elastic lamina delineating the neointima is indicated by a black arrow.

## Figure 3

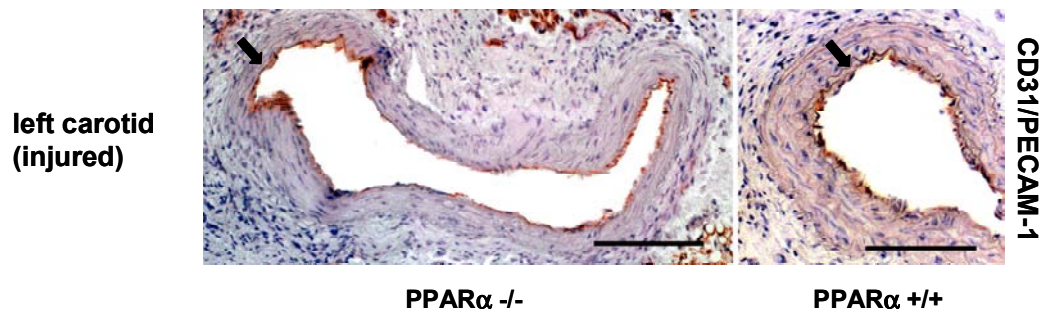

**Figure 3. Reendothelialization in PPAR $\alpha$ -null and wild-type mice after carotid injury.** Representative PPAR $\alpha$ -null (*left panel*) or wild-type (*right panel*) left carotid artery sections 3 weeks after injury at 200  $\mu$ M from the junction stained with a biotin-conjugated anti-mouse CD31 (PECAM-1) monoclonal rat antibody (BD Biosciences; 1:100 dilution) for endothelial cell labelling. Immunostains were visualized using the Vector NovaRed substrate kit (Vector Laboratories) (red). Bar = 100  $\mu$ M. The internal elastic laminæ delineating the neointima are indicated by a black arrow.
